# Supplementary material
Source: ML conference proceedings conference paper supplement (https://openaccess.thecvf.com/content/CVPR2024/html/Yang_Deformable_3D_Gaussians_CVPR_2024_paper.html)
Supplement: Supplementary file 1 [file Yang_Deformable_3D_Gaussians_CVPR_2024_supplemental.pdf]

# Deformable 3D Gaussians for High-Fidelity Monocular Dynamic Scene Reconstruction

– *Supplemental Material* –

Ziyi Yang<sup>1,2</sup> Xinyu Gao<sup>1</sup> Wen Zhou<sup>2</sup> Shaohui Jiao<sup>2</sup> Yuqing Zhang<sup>1</sup> Xiaogang Jin<sup>1†</sup>

<sup>1</sup>Zhejiang University <sup>2</sup>ByteDance Inc.

## A. Overview

This supplementary document provides some implementation details and further results that accompany the paper.

- Section B introduces the implementation details of the network architecture in our approach.
- Section C provides additional results, including more visualizations, rendering efficiency, more comparisons, and more ablations.
- Section D discusses the failure cases of our method.

## B. Implementation Details

### B.1. Network Architecture of the Deformation Field

We learn the deformation field with an MLP network  $\mathcal{F}_\theta : (\gamma(\text{sg}(\mathbf{x})), \gamma(t)) \rightarrow (\delta x, \delta r, \delta s)$ , which maps from each coordinate of 3D Gaussians and time to their corresponding deviations in position, rotation, and scaling. The weights  $\theta$  of the MLP are optimized through this mapping. As shown in Fig. 1, our MLP  $\mathcal{F}_\theta$  initially processes the input through eight fully connected layers that employ ReLU activations and feature 256-dimensional hidden layers, and outputs a 256-dimensional feature vector. This vector is subsequently passed through three additional fully connected layers (**without activation**) to separately output the offsets over time for position, rotation, and scaling. It should be noted that similar to NeRF, we concatenate the feature vector and the input in the fourth layer. Due to the compact structure of MLP, our additional storage compared to 3D Gaussians is only 2MB.

Our deformation field does not employ any grid/plane-based structures which have been demonstrated to be superior in static scenes because these structures are predicated on a **low-rank tensor assumption** [1]. Dynamic scenes possess a higher rank compared to static scenes, and explicit point-based rendering exacerbates the rank of the scene.

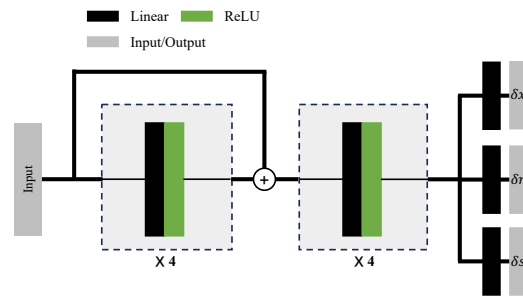

Figure 1. The architecture of our deformation MLP.

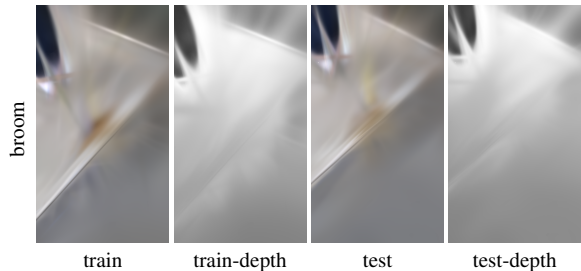

Figure 2. **Failure case on inaccurate pose.** Excessively inaccurate poses can lead to the failure of the convergence on the training set.

### B.2. Optimization Loss

During the training of our deformable Gaussians, we deform the 3D Gaussians at each timestep into the canonical space. We then optimize both the deformation network and the 3D Gaussians using a combination of  $\mathcal{L}_1$  loss and D-SSIM loss [2]:

$$\mathcal{L} = (1 - \lambda)\mathcal{L}_1 + \lambda\mathcal{L}_{\text{D-SSIM}}, \quad (1)$$

where  $\lambda = 0.2$  is used in all our experiments.

| Method         | Sieve           |                 |                    | Plate           |                 |                    | Bell            |                 |                    | Press           |                 |                    |
|----------------|-----------------|-----------------|--------------------|-----------------|-----------------|--------------------|-----------------|-----------------|--------------------|-----------------|-----------------|--------------------|
|                | PSNR $\uparrow$ | SSIM $\uparrow$ | LPIPS $\downarrow$ | PSNR $\uparrow$ | SSIM $\uparrow$ | LPIPS $\downarrow$ | PSNR $\uparrow$ | SSIM $\uparrow$ | LPIPS $\downarrow$ | PSNR $\uparrow$ | SSIM $\uparrow$ | LPIPS $\downarrow$ |
| 3D-GS          | 23.16           | 0.8203          | 0.2247             | 16.14           | 0.6970          | 0.4093             | 21.01           | 0.7885          | 0.2503             | 22.89           | 0.8163          | 0.2904             |
| TiNeuVox       | 21.49           | 0.8265          | 0.3176             | 20.58           | 0.8027          | 0.3317             | 23.08           | 0.8242          | 0.2568             | 24.47           | 0.8613          | 0.3001             |
| HyperNeRF      | 25.43           | 0.8798          | 0.1645             | 18.93           | 0.7709          | 0.2940             | 23.06           | 0.8097          | 0.2052             | 26.15           | 0.8897          | 0.1959             |
| NeRF-DS        | 25.78           | 0.8900          | 0.1472             | 20.54           | 0.8042          | 0.1996             | 23.19           | 0.8212          | 0.1867             | 25.72           | 0.8618          | 0.2047             |
| Ours (w/o AST) | 25.33           | 0.8620          | 0.1594             | 20.32           | 0.7173          | 0.3914             | 25.62           | 0.8498          | 0.1540             | 25.78           | 0.8613          | 0.1919             |
| Ours           | 25.70           | 0.8715          | 0.1504             | 20.48           | 0.8124          | 0.2224             | 25.74           | 0.8503          | 0.1537             | 26.01           | 0.8646          | 0.1905             |

  

| Method         | Cup             |                 |                    | As              |                 |                    | Basin           |                 |                    | Mean            |                 |                    |
|----------------|-----------------|-----------------|--------------------|-----------------|-----------------|--------------------|-----------------|-----------------|--------------------|-----------------|-----------------|--------------------|
|                | PSNR $\uparrow$ | SSIM $\uparrow$ | LPIPS $\downarrow$ | PSNR $\uparrow$ | SSIM $\uparrow$ | LPIPS $\downarrow$ | PSNR $\uparrow$ | SSIM $\uparrow$ | LPIPS $\downarrow$ | PSNR $\uparrow$ | SSIM $\uparrow$ | LPIPS $\downarrow$ |
| 3D-GS          | 21.71           | 0.8304          | 0.2548             | 22.69           | 0.8017          | 0.2994             | 18.42           | 0.7170          | 0.3153             | 20.29           | 0.7816          | 0.2920             |
| TiNeuVox       | 19.71           | 0.8109          | 0.3643             | 21.26           | 0.8289          | 0.3967             | 20.66           | 0.8145          | 0.2690             | 21.61           | 0.8234          | 0.2766             |
| HyperNeRF      | 24.59           | 0.8770          | 0.1650             | 25.58           | 0.8949          | 0.1777             | 20.41           | 0.8199          | 0.1911             | 23.45           | 0.8488          | 0.1990             |
| NeRF-DS        | 24.91           | 0.8741          | 0.1737             | 25.13           | 0.8778          | 0.1741             | 19.96           | 0.8166          | 0.1855             | 23.60           | 0.8494          | 0.1816             |
| Ours (w/o AST) | 24.80           | 0.8848          | 0.1571             | 26.29           | 0.8800          | 0.1830             | 19.68           | 0.7869          | 0.1888             | 23.97           | 0.8346          | 0.2037             |
| Ours           | 24.86           | 0.8908          | 0.1532             | 26.31           | 0.8842          | 0.1783             | 19.67           | 0.7934          | 0.1901             | 24.11           | 0.8524          | 0.1769             |

Table 1. **Quantitative comparison on NeRF-DS dataset per-scene.** We color each cell as **best**, **second best**, and **third best**. Our method, overall, achieves the best rendering quality and robust convergence in the majority of scenes. It is worth noting that the metrics we used are the same as those in the main text, with LPIPS using the VGG network. Our measurement metrics differ slightly from those used in NeRF-DS and HyperNeRF because their papers use MS-SSIM and LPIPS with the AlexNet.

| D-NeRF Dataset |     |         | NeRF-DS Dataset |     |         | HyperNeRF Dataset |     |         |
|----------------|-----|---------|-----------------|-----|---------|-------------------|-----|---------|
| Scene          | FPS | Num (k) | Scene           | FPS | Num (k) | Scene             | FPS | Num (k) |
| Lego           | 24  | 300     | AS              | 48  | 185     | Espresso          | 15  | 620     |
| Jump           | 85  | 90      | Basin           | 29  | 250     | Americano         | 6   | 1,300   |
| Bouncing       | 38  | 170     | Bell            | 18  | 400     | Cookie            | 9   | 1,080   |
| T-Rex          | 30  | 220     | Cup             | 35  | 200     | Chicken           | 10  | 740     |
| Mutant         | 40  | 170     | Plate           | 31  | 230     | Torchocolate      | 8   | 1,030   |
| Warrior        | 172 | 40      | Press           | 48  | 185     | Lemon             | 23  | 420     |
| Standup        | 93  | 80      | Sieve           | 35  | 200     | Hand              | 6   | 1,750   |
| Hook           | 45  | 150     |                 |     |         | Printer           | 12  | 650     |

Table 2. **Experiments on FPS with respect to the number of 3D Gaussians.** The results of the experiments demonstrate that our method is capable of real-time rendering on a 3090 GPU when the number of point clouds is less than 250k. The excessively high number of 3D Gaussians in HyperNeRF reflects the critical importance of the camera pose accuracy for the convergence of our method.

## C. Additional Results

### C.1. Per-Scene Results on the NeRF-DS Dataset

In Tab. 1, we provide the results for individual scenes associated with Sec. 4 of the main paper. It can be observed that our method achieved superior metrics in almost every scene compared to those without AST, underscoring the generalizability of AST on real datasets where the pose is not perfectly accurate. Overall, our method outperforms baselines on the NeRF-DS Dataset.

### C.2. Results on the HyperNeRF Dataset

We visualize the results of the HyperNeRF dataset in Fig. 3. Notably, metrics designed to assess image rendering quality, such as PSNR, tend to penalize minor offsets more heavily than blurring. Therefore, for datasets with less accurate camera poses, like HyperNeRF, our method’s quantitative

metrics might not consistently outperform those of methods yielding blurred outputs when faced with imprecise camera poses. Despite this, our rendered images often exhibit fewer artifacts and greater clarity. This phenomenon aligns with observations reported in Nerfies [4] and HyperNeRF [5].

### C.3. Results on Rendering Efficiency

In our research, we present comprehensive Frames Per Second (FPS) testing results in Tab. 2. Tests were conducted on one NVIDIA RTX 3090. It is observed that when the number of point clouds remains below  $\sim 250k$ , our method can achieve real-time rendering at rates greater than 30 FPS. A point of note is that the point cloud count reconstructed from the HyperNeRF dataset significantly exceeds that of other datasets, reaching a level of 1,000k. This excessive count is attributed to the highly inaccurate camera poses within the HyperNeRF dataset. In contrast, the NeRF-

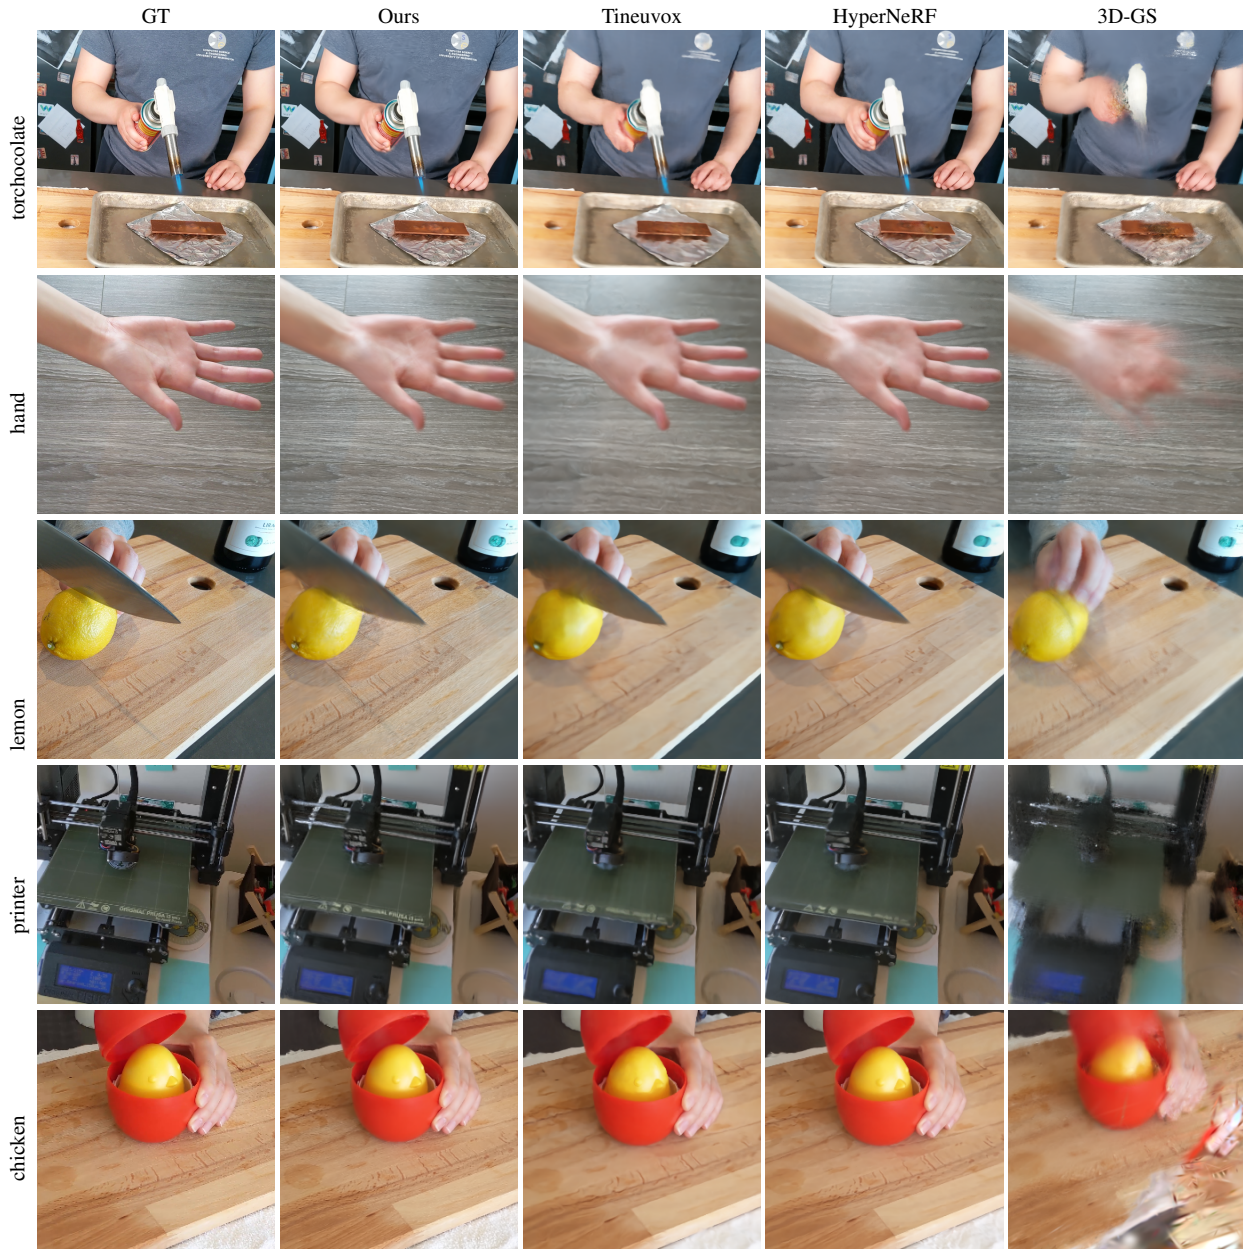

Figure 3. **Qualitative comparisons of baselines and our method on HyperNeRF dataset.** The first three rows present the results of the time interpolation task, while the last two rows depict the outcomes of the novel viewpoint synthesis task. Experimental results indicate that our method can achieve superior rendering quality on real datasets where the pose is not absolutely precise.

|            | lego         | jump         | bouncing     | trex         | mutant       | warrior      | standup      | hook         | mean         |
|------------|--------------|--------------|--------------|--------------|--------------|--------------|--------------|--------------|--------------|
| ours       | <b>33.07</b> | <b>37.72</b> | 41.01        | 38.10        | 42.63        | 41.54        | 44.62        | 37.42        | 39.51        |
| ours-SE(3) | 32.91        | 37.60        | <b>41.05</b> | <b>38.29</b> | <b>42.83</b> | <b>41.73</b> | <b>44.68</b> | <b>37.60</b> | <b>39.58</b> |

Table 3. Comparison with SE(3) deformation field on the D-NeRF dataset.

|            | as           | basin        | bell         | cup          | plate        | press        | sieve        | mean         |
|------------|--------------|--------------|--------------|--------------|--------------|--------------|--------------|--------------|
| ours       | 26.31        | <b>19.67</b> | <b>25.74</b> | <b>24.86</b> | <b>20.48</b> | <b>26.01</b> | <b>25.70</b> | <b>24.11</b> |
| ours-SE(3) | <b>26.37</b> | 19.64        | 25.43        | 24.83        | 20.28        | 25.63        | 25.46        | 23.95        |

Table 4. Comparison with SE(3) deformation field on the NeRF-DS dataset.



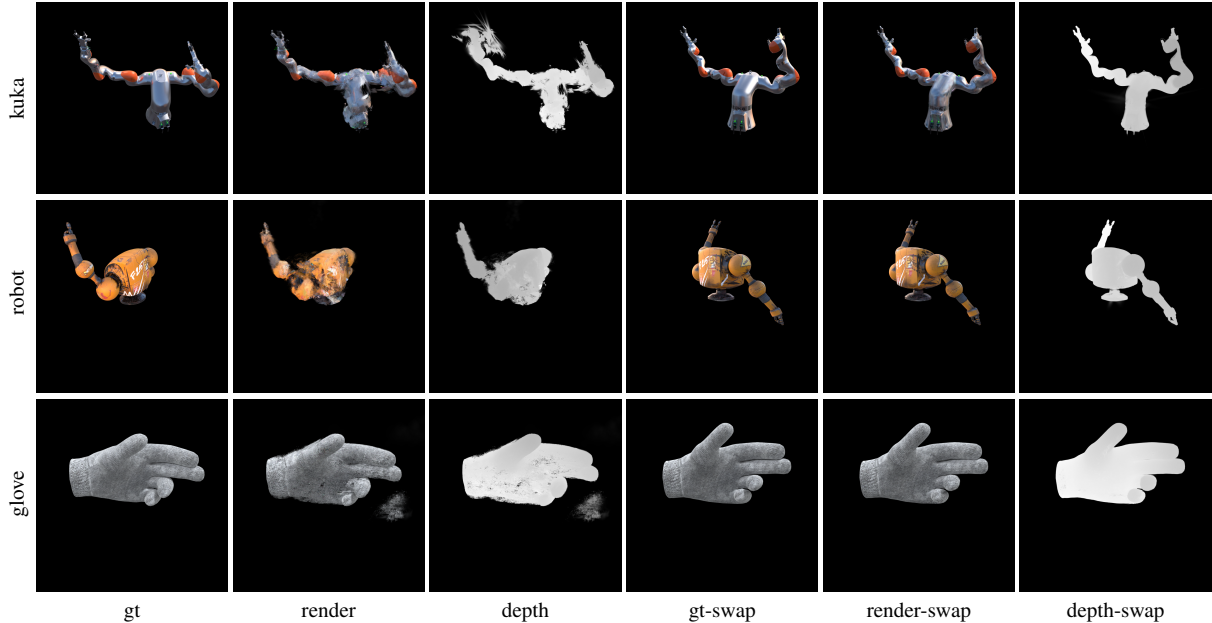

Figure 4. **Failure case on few training viewpoints.** The first three columns represent the original dataset configurations. The term **swap** indicates the exchange of training and test sets, thereby ensuring that the model’s inputs possess a sufficiently diverse array of viewpoints

|                | Hell Warrior   |        |        | Mutant        |        |        | Hook  |        |        |
|----------------|----------------|--------|--------|---------------|--------|--------|-------|--------|--------|
|                | PSNR↑          | SSIM↑  | LPIPS↓ | PSNR↑         | SSIM↑  | LPIPS↓ | PSNR↑ | SSIM↑  | LPIPS↓ |
| w/o $\delta s$ | 41.55          | 0.9878 | 0.0223 | 42.15         | 0.9949 | 0.0053 | 37.01 | 0.9859 | 0.0153 |
| w/o $\delta r$ | 41.17          | 0.9866 | 0.0256 | 42.51         | 0.9950 | 0.0054 | 36.82 | 0.9852 | 0.0167 |
| w r&s          | 40.39          | 0.9833 | 0.0323 | 41.30         | 0.9934 | 0.0075 | 36.15 | 0.9818 | 0.0214 |
| ours           | 41.54          | 0.9873 | 0.0234 | 42.63         | 0.9951 | 0.0052 | 37.42 | 0.9867 | 0.0144 |
|                | Bouncing Balls |        |        | Lego          |        |        | T-Rex |        |        |
|                | PSNR↑          | SSIM↑  | LPIPS↓ | PSNR↑         | SSIM↑  | LPIPS↓ | PSNR↑ | SSIM↑  | LPIPS↓ |
| w/o $\delta s$ | 40.82          | 0.9952 | 0.0095 | 31.30         | 0.9705 | 0.0260 | 37.39 | 0.9928 | 0.0105 |
| w/o $\delta r$ | 41.11          | 0.9953 | 0.0092 | 32.87         | 0.9783 | 0.0192 | 37.99 | 0.9931 | 0.0101 |
| w r&s          | 39.89          | 0.9945 | 0.0117 | 33.71         | 0.9798 | 0.0181 | 37.06 | 0.9923 | 0.0113 |
| ours           | 41.01          | 0.9953 | 0.0093 | 33.07         | 0.9794 | 0.0183 | 38.10 | 0.9933 | 0.0098 |
|                | Stand Up       |        |        | Jumping Jacks |        |        | Mean  |        |        |
|                | PSNR↑          | SSIM↑  | LPIPS↓ | PSNR↑         | SSIM↑  | LPIPS↓ | PSNR↑ | SSIM↑  | LPIPS↓ |
| w/o $\delta s$ | 44.05          | 0.9946 | 0.0074 | 37.49         | 0.9895 | 0.0129 | 38.97 | 0.9889 | 0.0137 |
| w/o $\delta r$ | 44.18          | 0.9946 | 0.0075 | 37.48         | 0.9893 | 0.0138 | 39.27 | 0.9897 | 0.0134 |
| w r&s          | 42.88          | 0.9932 | 0.0097 | 37.00         | 0.9878 | 0.0164 | 38.55 | 0.9883 | 0.0160 |
| ours           | 44.62          | 0.9951 | 0.0063 | 37.72         | 0.9897 | 0.0126 | 39.51 | 0.9902 | 0.0124 |

Table 5. **Ablations on network architecture.** We color each cell as **best** and **second best**.  $\delta r$  and  $\delta s$  denote the output components of the MLP model. The term **w r&s** signifies that the model inputs include not only time and the position of the 3D Gaussians but also the 3D Gaussians’ rotation and scaling. The experimental outcomes affirm that our network architecture is the most advantageous.

DS dataset, while also being derived from the real world, exhibits more accurate poses, resulting in a reconstructed point cloud count within a reasonable range. This issue of an overabundant point cloud count occurs not only in scenes with inaccurate poses but also in those with sparse viewpoints, as evidenced in scenes like the D-NeRF’s Lego scene, which was trained on merely 50 images.

#### C.4. More Ablations

**Network architecture.** We present ablation experiments on the architecture of our purely implicit network, as shown in Tab. 5. The results of these experiments suggest that the structure within our pipeline is optimal. Notably, we did not adopt Grid/Plane-based structures because dynamic scenes do not conform to the **low-rank assumption**. Furthermore,



|            | lego         | jump         | bouncing     | trex         | mutant       | warrior      | standup      | hook         | mean         |
|------------|--------------|--------------|--------------|--------------|--------------|--------------|--------------|--------------|--------------|
| ours       | <b>33.07</b> | <b>37.72</b> | 41.01        | 38.10        | <b>42.63</b> | <b>41.54</b> | <b>44.62</b> | <b>37.42</b> | <b>39.51</b> |
| ours-white | 32.03        | 36.87        | <b>43.52</b> | <b>38.57</b> | 42.11        | 32.75        | 42.40        | 36.60        | 38.10        |
| ours-best  | 33.07        | 37.72        | 43.52        | 38.57        | 42.63        | 41.54        | 44.62        | 37.42        | 39.89        |

Table 6. **Comparison with different background colors on the D-NeRF dataset.** We explored the impact of different background colors on rendering metrics using the D-NeRF dataset. The experimental results showed that overall, a black background yielded higher metrics, while bouncing and trex scenes performed better with a white background, and the warrior scene had higher metrics with a black background. To ensure **experimental consistency**, we uniformly used a black background in the main text. If one wishes to pursue the best metrics for a specific scene, one can refer to this table to adjust the background color.

the explicit point-based rendering of 3D-GS exacerbates the rank of dynamic scenes. Our early experimental validations have corroborated this assertion.

### C.5. Background color

In the research of Neural Rendering, it’s common to use a black or white background for rendering scenes without a background. In our experiments, we found that the background color has an impact on certain scenes in the D-NeRF dataset. The experimental results are shown in Tab. 6. Overall, a black background yields better rendering results. For the sake of consistency in our experiments, we uniformly used a black background in our main text experiments. However, for the bouncing and trex scenes, using a white background can produce better results.

### C.6. Deformation using SE(3) Field

Drawing inspiration from Nerfies [4], we applied a 6-DOF SE(3) field that accounts for rotation to the transformation of 3D Gaussian positions. The experimental results, presented in Tab. 3 and Tab. 4, indicate that this constraint offers a minor improvement on the D-NeRF dataset. However, it appears to diminish the quality on the more complex real-world NeRF-DS dataset. Moreover, the additional computational overhead introduced by the SE(3) Field approximately increases 50 % of the training time and results in about a 20% decrease in FPS during rendering. Consequently, we opted to utilize a direct addition without imposing SE(3) constraints on the transformation of position.

## D. Failure Cases

**Inaccurate poses.** In our research, we find that inaccurate poses can lead to the failure of the convergence of deformable-gs, as illustrated in Fig. 2. For implicit representations, their inherent smoothness can maintain robustness in the face of minor deviations in pose. However, for the explicit point-based rendering, such inaccuracies are particularly detrimental, resulting in inconsistencies in the scene at different moments.

**Few training viewpoints.** In our study, a notable scarcity of training views presents a dual challenge: both few-shot learning and a limited number of viewpoints. Either aspect can lead to overfitting in deformable-gs and even in 3D-GS on the training set. As demonstrated in Fig. 4, significant overfitting is evident in the DeVRF [3] dataset. The training set for this scene contains 100 images, but the viewpoints for training are limited to only four. However, by swapping the training and test sets, where the test set contained an equal number of 100 images and viewpoints, we obtained markedly better results.

## References

- [1] Anpei Chen, Zexiang Xu, Andreas Geiger, Jingyi Yu, and Hao Su. Tensorf: Tensorial radiance fields. In *European Conference on Computer Vision (ECCV)*, pages 333–350, 2022. 1
- [2] Bernhard Kerbl, Georgios Kopanas, Thomas Leimkühler, and George Drettakis. 3d gaussian splatting for real-time radiance field rendering. *ACM Transactions on Graphics*, 42(4):1–14, 2023. 1
- [3] Jia-Wei Liu, Yan-Pei Cao, Weijia Mao, Wenqiao Zhang, David Junhao Zhang, Jussi Keppo, Ying Shan, Xiaohu Qie, and Mike Zheng Shou. Devrf: Fast deformable voxel radiance fields for dynamic scenes. *Advances in Neural Information Processing Systems*, 35:36762–36775, 2022. 5
- [4] Keunhong Park, Utkarsh Sinha, Jonathan T Barron, Sofien Bouaziz, Dan B Goldman, Steven M Seitz, and Ricardo Martin-Brualla. Nerfies: Deformable neural radiance fields. In *Proceedings of the IEEE/CVF International Conference on Computer Vision*, pages 5865–5874, 2021. 2, 5
- [5] Keunhong Park, Utkarsh Sinha, Peter Hedman, Jonathan T. Barron, Sofien Bouaziz, Dan B Goldman, Ricardo Martin-Brualla, and Steven M. Seitz. Hypernerf: A higher-dimensional representation for topologically varying neural radiance fields. *ACM Transactions on Graphics*, 40(6):1–12, 2021. 2
